# Supplementary material
Source: Springer Nature journal article supplement (https://www.springermedizin.de/resource/supplementary/13058_2011_2938_MOESM9_ESM.pdf/9702934)

**A**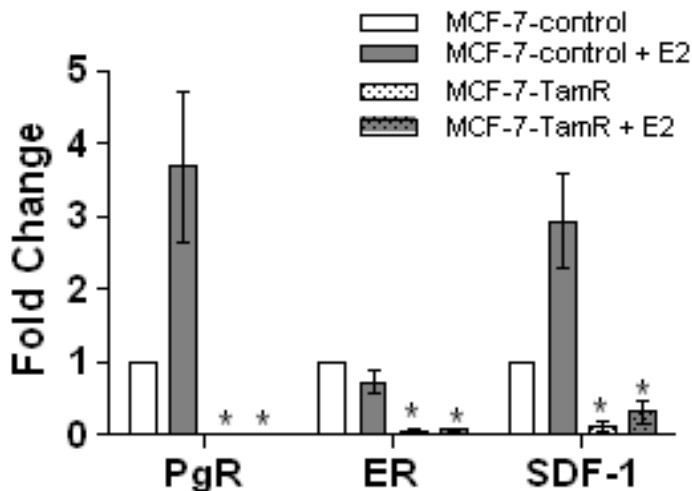**B**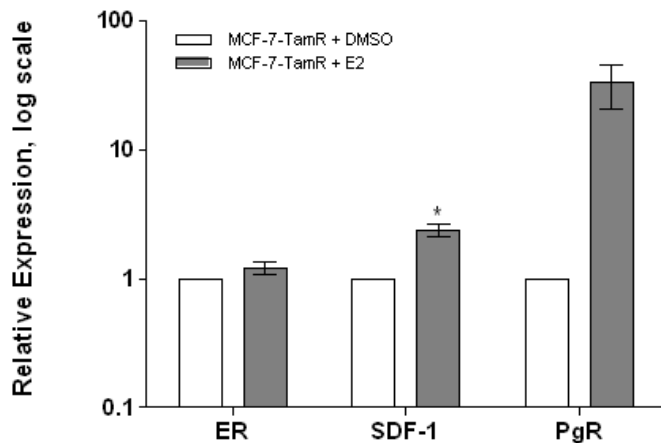

Supplement: MOESM9 [file 9702934]
